# Supplementary material for: OH radical reactions with phenylalanine in free and peptide forms
Source: Royal Society of Chemistry journal article supplement (doi:10.1039/b716024k), 2008-01-01
Supplement: b716024k_2.pdf [file b716024k_2.pdf]

## Figures captions

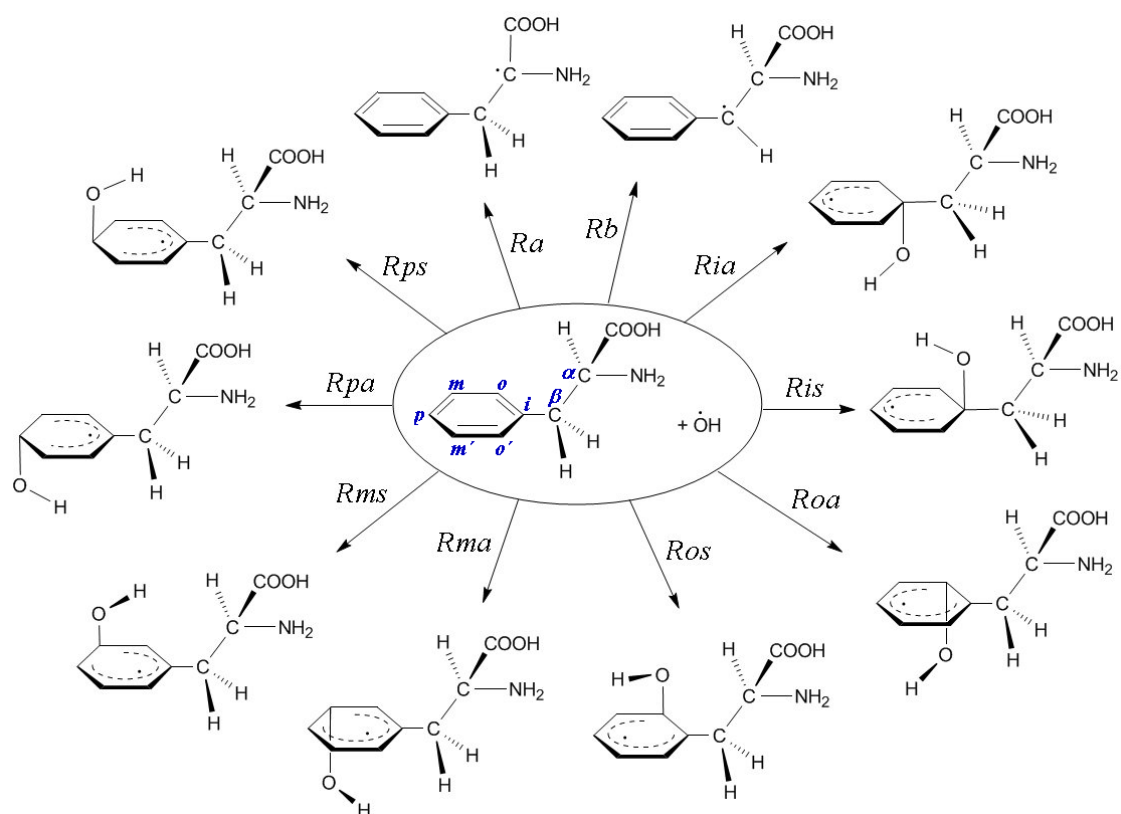

**Figure 1.** Schematic representation of the studied paths of reaction, based on the transition state structures.

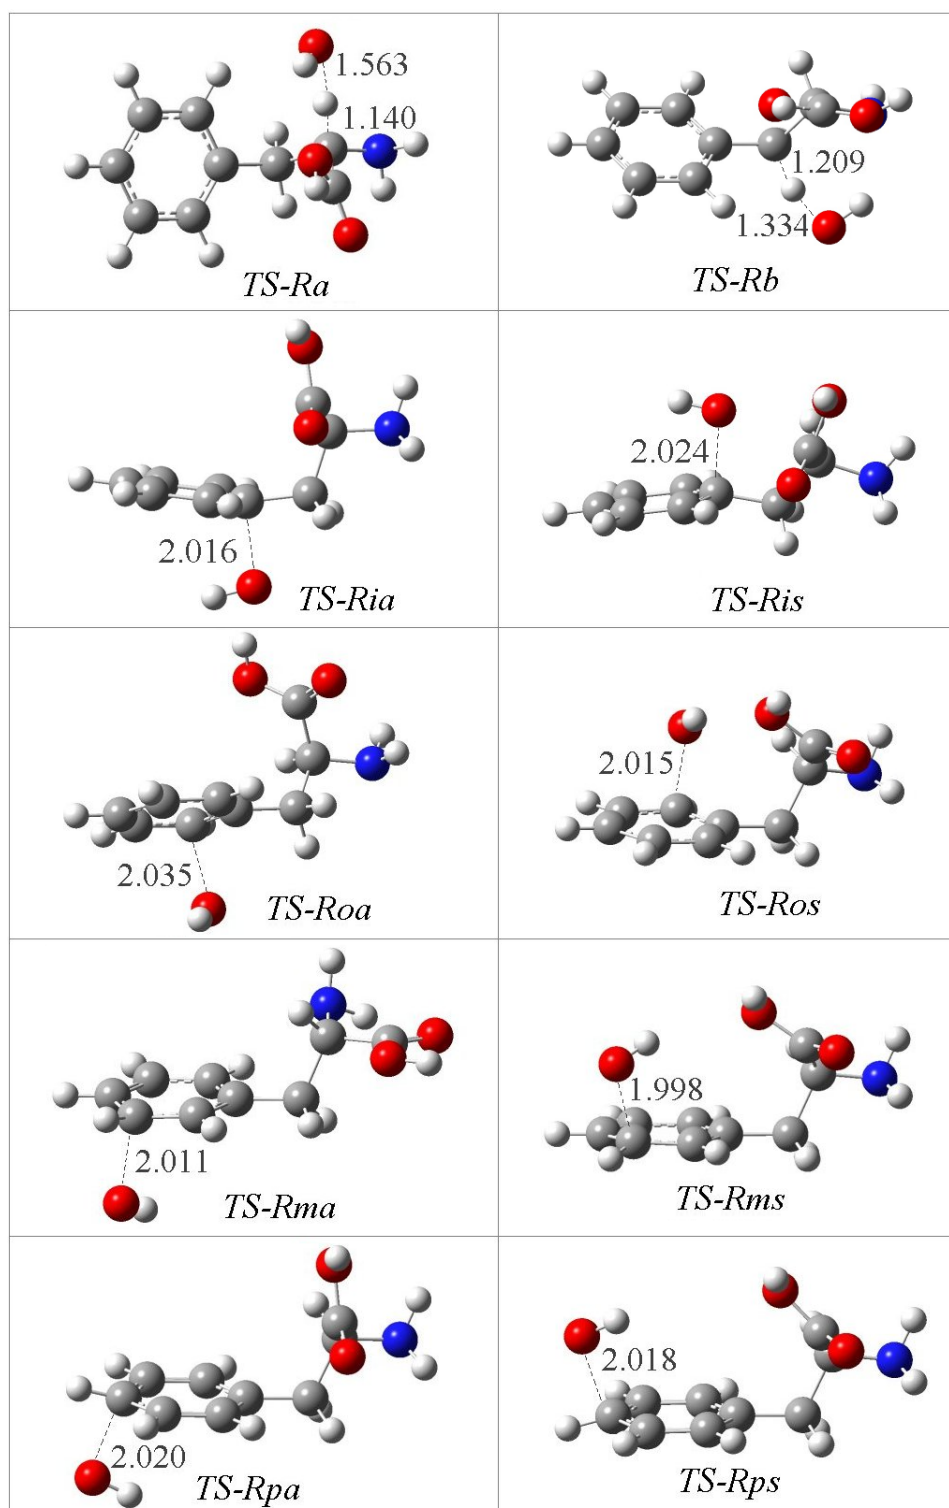

**Figure 2.** Fully optimized geometries of the Phe + OH transition states.

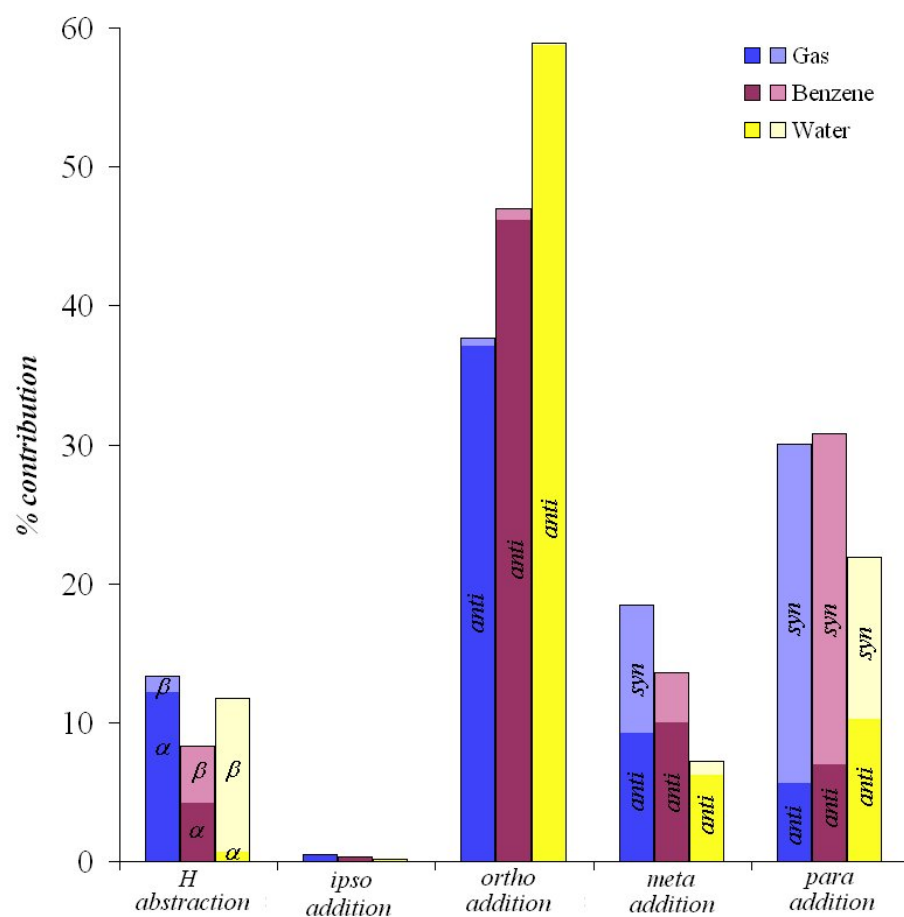

**Figure 3.** Percentage contribution of the different channels to the Phe + OH overall reaction.

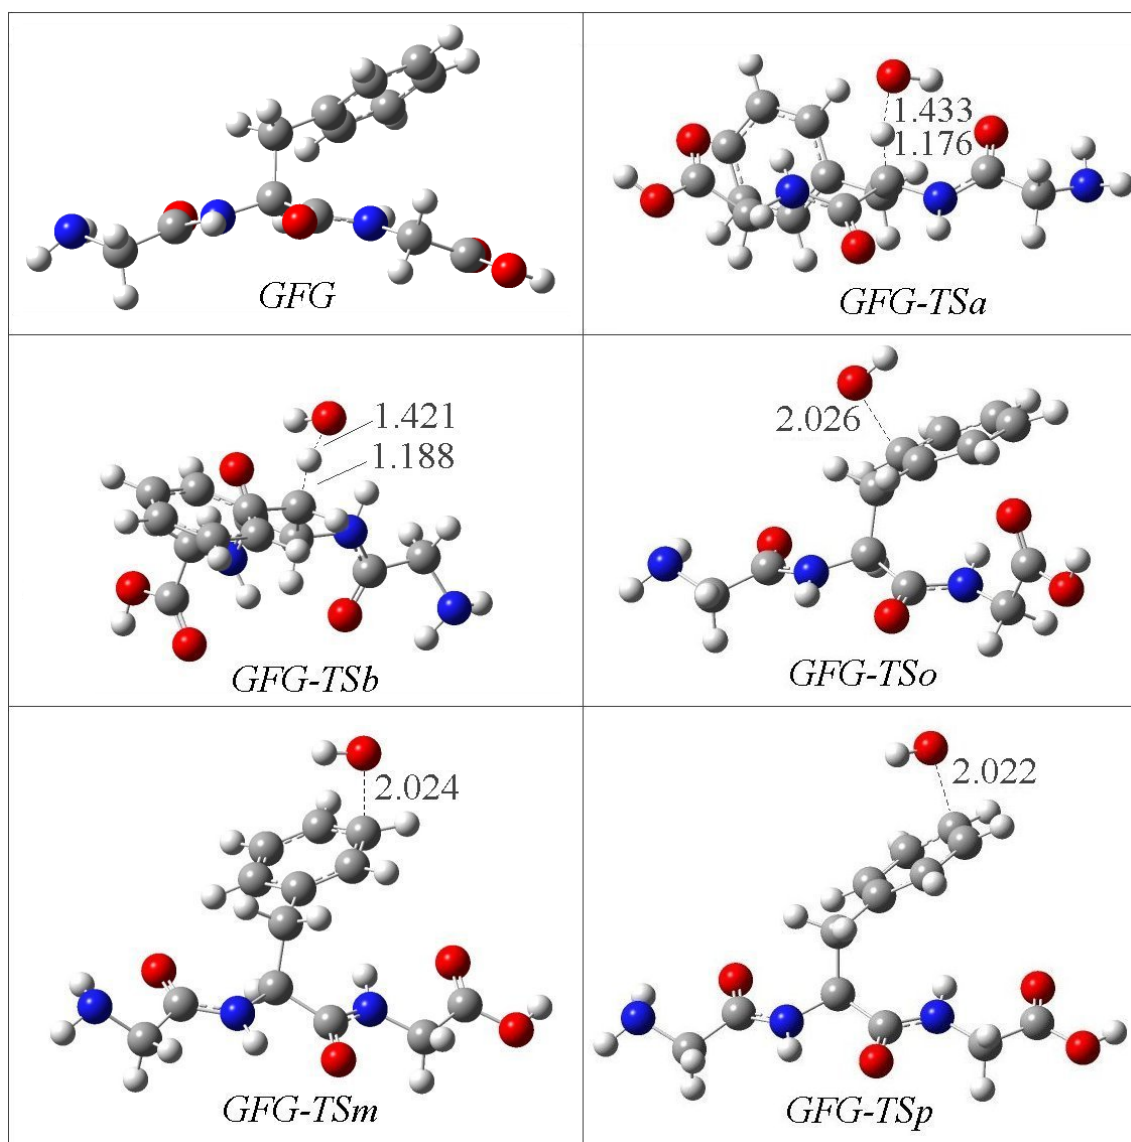

**Figure 4.** Fully optimized geometries of GFG + OH transition states.
